# Supplementary material for: Bacterial DnaK reduces the activity of anti-cancer drugs cisplatin and 5FU
Source: Springer Nature journal article supplement (doi:10.1186/s12967-024-05078-x), 2024-03-12
Supplement: 12967_2024_5078_MOESM3_ESM.pdf [file 12967_2024_5078_MOESM3_ESM.pdf]

Fig.S3A

Number of Samples Per disease\_type  
ALL samples (n=10,293 samples)

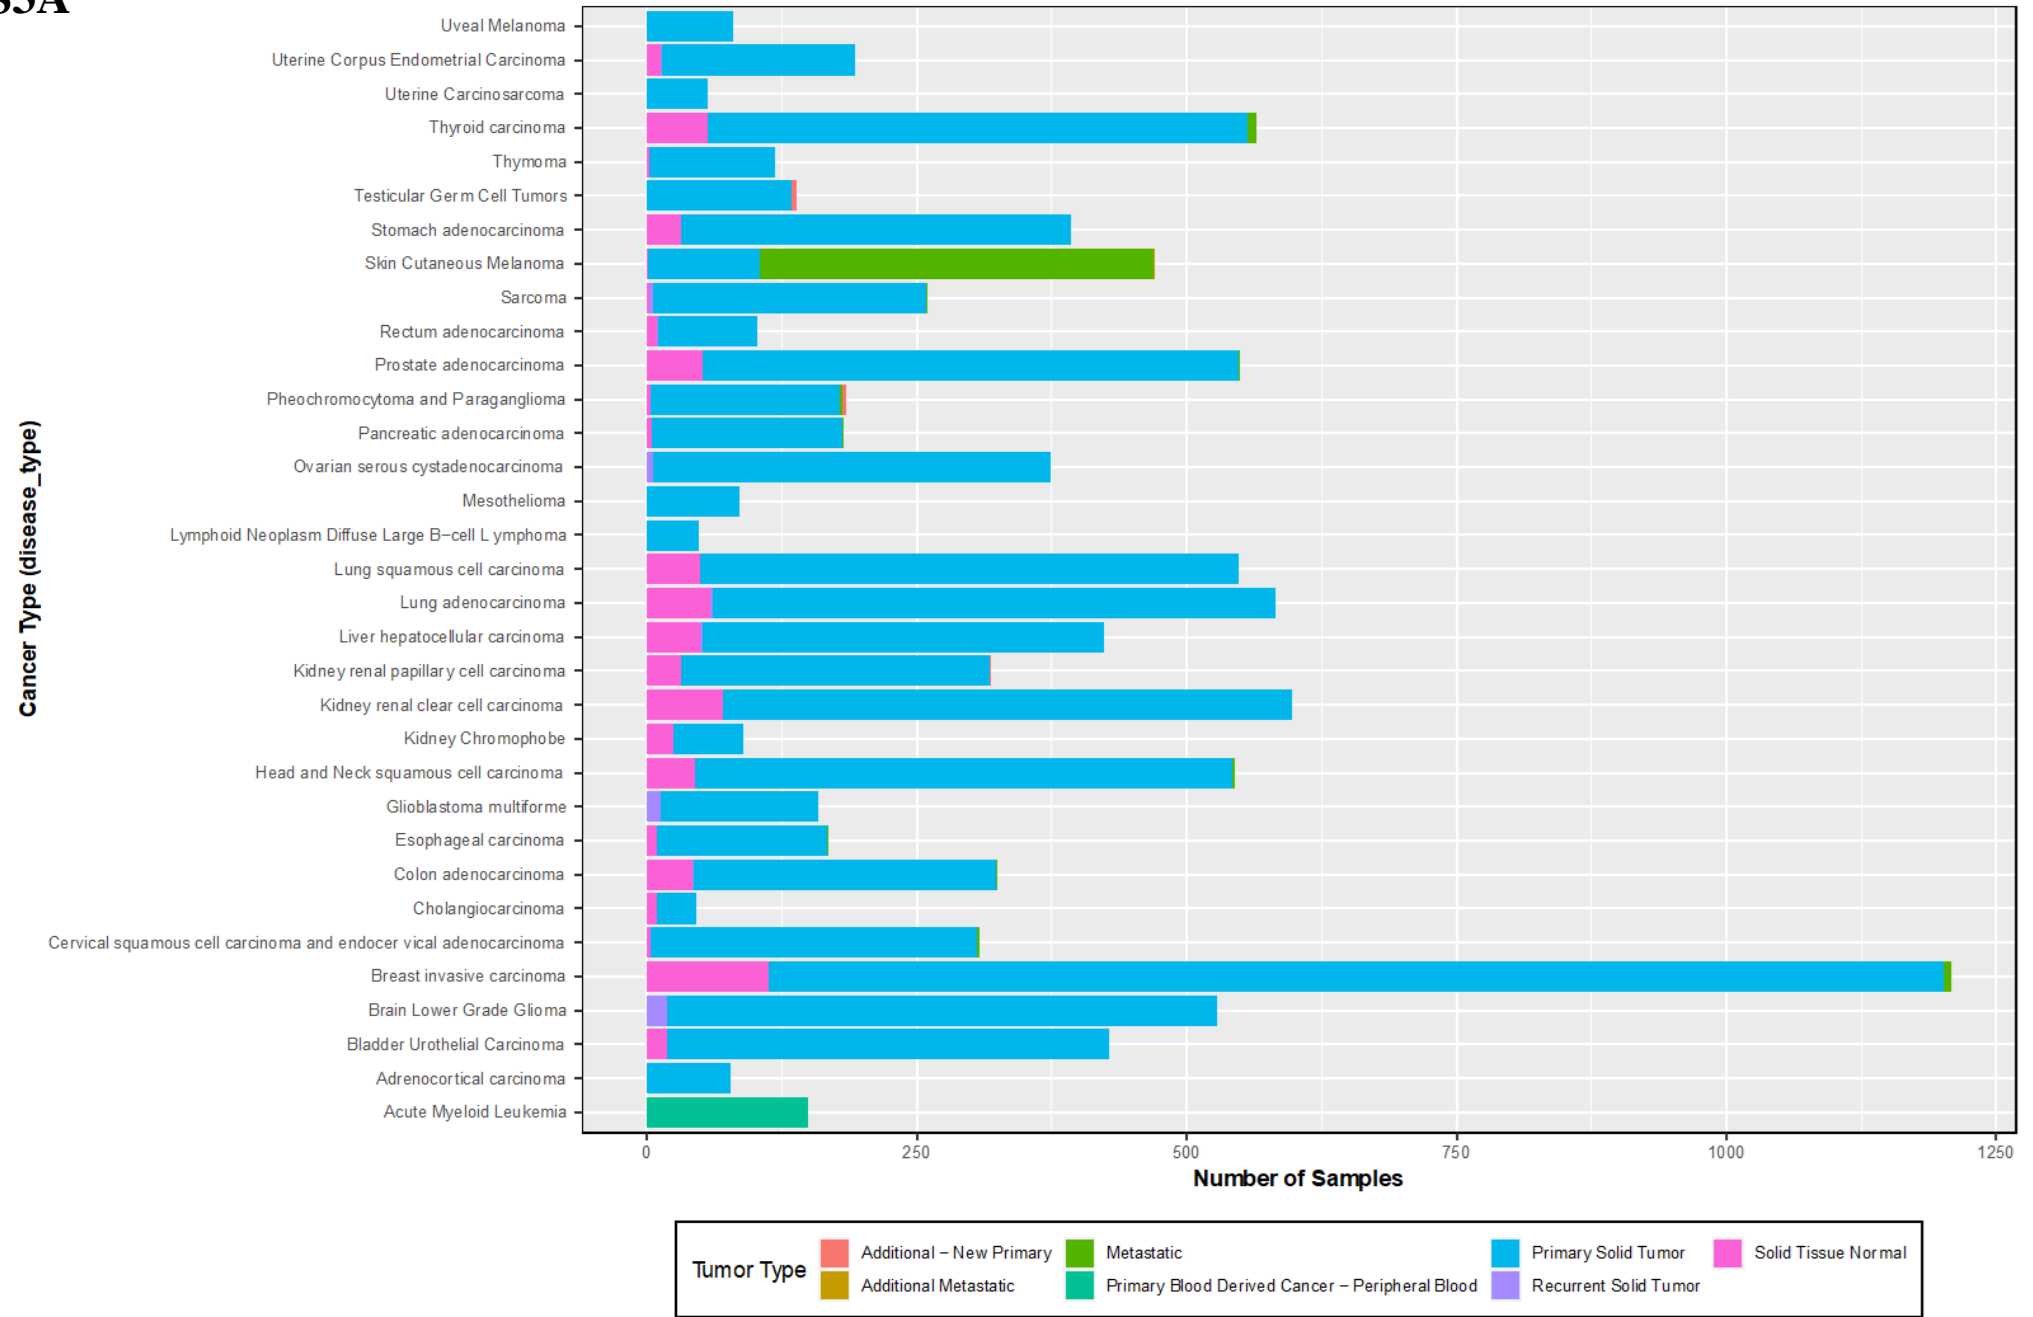

Fig.S3B

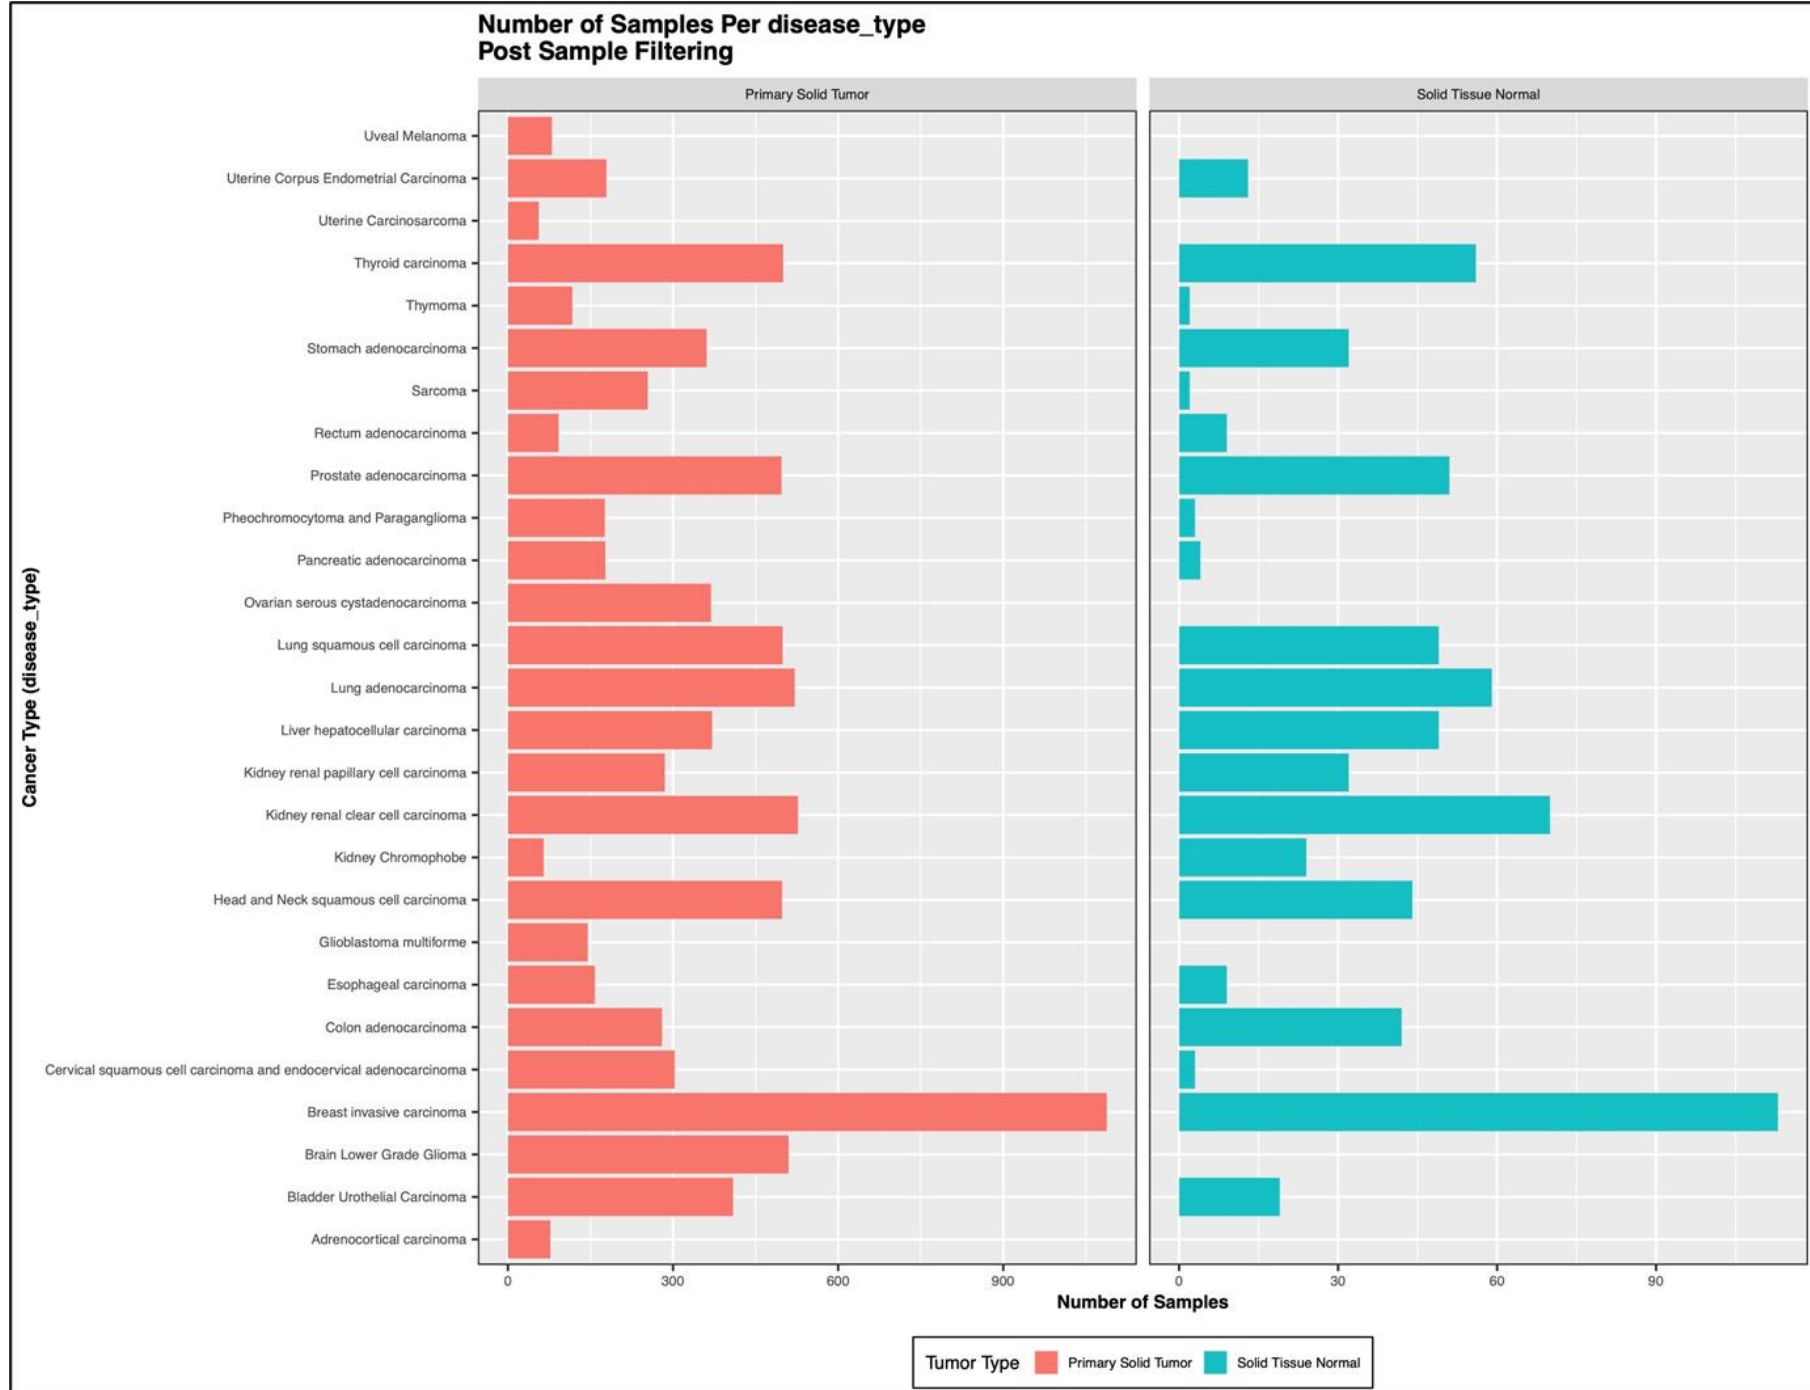

**Fig.S3 A) Distribution of the number of samples across cancer types retrieved from TCGA (n=10,293).  
B) Post- filtering distribution of the primary solid tumor and solid tissue normal samples across cancer types included in the analyses.**
