# Supplementary material for: Bacterial DnaK reduces the activity of anti-cancer drugs cisplatin and 5FU
Source: Springer Nature journal article supplement (doi:10.1186/s12967-024-05078-x), 2024-03-12
Supplement: 12967_2024_5078_MOESM4_ESM.pdf [file 12967_2024_5078_MOESM4_ESM.pdf]

**Table S1. qPCR shows variable copy number of Mycoplasma and Fusobacterium DnaK in primary cells from colon and stomach cancers. (ND: not detected)**

| <b>Patient ID</b> | <b>Tumor Site</b> | <b>M-DnaK DNA<br/>copies/50ng total<br/>DNA</b> | <b>F-DnaK DNA<br/>copies/50ng total<br/>DNA</b> |
|-------------------|-------------------|-------------------------------------------------|-------------------------------------------------|
| <b>30284</b>      | <b>Colon</b>      | <b>95100</b>                                    | <b>4800</b>                                     |
| <b>30357</b>      | <b>Colon</b>      | <b>10000</b>                                    | <b>1000</b>                                     |
| <b>P0859</b>      | <b>Colon</b>      | <b>3720</b>                                     | <b>2580</b>                                     |
| <b>30549</b>      | <b>Colon</b>      | <b>ND</b>                                       | <b>3280</b>                                     |
| <b>P0860</b>      | <b>Colon</b>      | <b>3640</b>                                     | <b>ND</b>                                       |
| <b>30304</b>      | <b>Stomach</b>    | <b>15940</b>                                    | <b>1140</b>                                     |
| <b>P0861</b>      | <b>Stomach</b>    | <b>296560</b>                                   | <b>2880</b>                                     |
| <b>P0862</b>      | <b>Stomach</b>    | <b>3400</b>                                     | <b>860</b>                                      |
| <b>30404</b>      | <b>Stomach</b>    | <b>81560</b>                                    | <b>15760</b>                                    |
