# Supplementary material for: Bacterial DnaK reduces the activity of anti-cancer drugs cisplatin and 5FU
Source: Springer Nature journal article supplement (doi:10.1186/s12967-024-05078-x), 2024-03-12
Supplement: 12967_2024_5078_MOESM5_ESM.pdf [file 12967_2024_5078_MOESM5_ESM.pdf]

**Table S2. Template sequence used for DnaK domains' comparison.**

>Mycoplasma fermentans no info;1-366;367-481;482-585  
MAKETIIGIDLGTTNSAVAIVDGGTPIVLENYNGKRTTPSVVSFKDGEIIVGENAKNQIETNPDTIASVKRFM  
GTTKIFKANGKEYKPEEISAIILDHLRKYAEEKVGHKIEKAVITVPAYFDNAQREATKIAGKIAGLDVLRIN  
EPTAAALAFGLDKTNKEMKVLVFDLGGGTFDVSILELADGTFEVLATSGDNKLGDDWDHEIVDWLVAKIKND  
HKIDIRENKMAMARLKAAAEEKAKIDLSSSLVAHISLPFLVLLDNHEPINVEAELKRSEFEKMTAKLVERCRRP  
IQDALSEAKLKISDLDEILLVGGSTRIPAVQALVEKILNRKPNKSVNPDEVVAMGAAIQGAVLAGDINDILLV  
DVTPLTLGIETAGGISTPLIPRNTTRIPITKSETFTTFENNQTDVTIKIVQGERPVASENKLLGQFNLTGIRPA  
PRGIPQIEVSFKIDANGITTVSAKDKDTQKEQSITIKNSSKLSEEVERMIKEAEENREADAKRAADIEIIVR  
AETMVAKFESVLEENKDKLTQDQINQAQAEIDKINGFIKEKEYDQLRLTIKAFEELLDMSNADSSSFKEEDA  
E
